# Supplementary material for: The "Majority Illusion" in Social Networks
Source: PLOS journal article supplement (doi:10.1371/journal.pone.0147617), 2016-02-17
Supplement: S1 (10.1371/journal.pone.0147617.s001) [file journal.pone.0147617.s001]

## S1 Friendship Paradox

The friendship paradox says that the average degree of neighbors of a node of degree  $k$  is larger than  $k$  [1]. We demonstrate that the paradox holds globally by showing that average neighbor degree  $\langle k \rangle_q$  is larger than average node degree  $\langle k \rangle$ :

$$\langle k \rangle_q - \langle k \rangle = \sum_k \frac{k^2 p(k)}{\langle k \rangle} - \langle k \rangle = \frac{\langle k^2 \rangle - \langle k \rangle^2}{\langle k \rangle} = \frac{\sigma_k^2}{\langle k \rangle},$$

Here  $\sigma_k$  is the standard deviation of the degree distribution  $p(k)$ . Since  $\sigma_k \geq 0$ ,  $\langle k \rangle_q - \langle k \rangle \geq 0$ . This confirms that the friendship paradox has its origins in the heterogeneous degree distribution, and is more pronounced in networks with larger degree heterogeneity  $\sigma_k$ .

Heterogeneous degree distribution also contributes to nodes perceiving that their neighbors have more of some attribute than they themselves have — what is referred to as the generalized friendship paradox [2]. Let's consider again a network where nodes have a binary attribute  $x$ . For convenience, we will refer to nodes with the attribute value  $x = 1$  as active, and those with  $x = 0$  as inactive. The probability that a random node is active is  $P(x = 1) = \sum_k P(x = 1|k)p(k)$ . The probability that a random neighbor is active is  $Q(x = 1) = \sum_k P(x = 1|k)q(k)$ . Using Bayes' rule, this can be rewritten as

$$\begin{aligned} Q(x = 1) &= \sum_k \frac{P(x = 1, k) k p(k)}{p(k)} \frac{1}{\langle k \rangle} = \sum_k \frac{P(x = 1, k) k P(x = 1)}{P(x = 1) \langle k \rangle} \\ &= \frac{P(x = 1)}{\langle k \rangle} \sum_k k P(k|x = 1) = P(x = 1) \frac{\langle k \rangle_{x=1}}{\langle k \rangle}, \end{aligned}$$

where  $\langle k \rangle_{x=1}$  is the average degree of active nodes. This quantity and the average degree  $\langle k \rangle$  are related via the correlation coefficient  $\rho_{kx} = \frac{P(x=1)}{\sigma_x \sigma_k} [\langle k \rangle_{x=1} - \langle k \rangle]$  (Eq. ??). Hence, the strength of the generalized friendship paradox is

$$Q(x = 1) - P(x = 1) = \rho_{kx} \frac{\sigma_x \sigma_k}{\langle k \rangle},$$

which is positive when node degree and attribute are positively correlated ( $\rho_{kx} > 0$ ) and increases with this correlation [2].

## References

1. Feld SL. Why Your Friends Have More Friends Than You Do. American Journal of Sociology. 1991 May;96(6):1464–1477.
2. Eom YH, Jo HH. Generalized friendship paradox in complex networks: The case of scientific collaboration. Scientific Reports. 2014 Apr;4.
